# Supplementary material for: Antimicrobial Dispensing Practices during COVID-19 and the Implications for Pakistan
Source: MDPI journal article supplement (doi:10.3390/antibiotics12061018), 2023-06-06
Supplement: s1 [file s1]

## Supplementary Material

**Table S1.** Initiatives to improve antibiotic utilization among physicians in ambulatory care in LMICs.

| Country, Year and Reference | Intervention                                                                                                                                                                                                                                                                                                                                                                                                                                       | Impact                                                                                                                                                                                                                                                                                                                                                                                                                                                                       |
|-----------------------------|----------------------------------------------------------------------------------------------------------------------------------------------------------------------------------------------------------------------------------------------------------------------------------------------------------------------------------------------------------------------------------------------------------------------------------------------------|------------------------------------------------------------------------------------------------------------------------------------------------------------------------------------------------------------------------------------------------------------------------------------------------------------------------------------------------------------------------------------------------------------------------------------------------------------------------------|
| Malaysia, 2006 [90]         | Principally education involving academic detailing from the resident family medicine specialist alongside an information leaflet                                                                                                                                                                                                                                                                                                                   | <ul style="list-style-type: none"> <li>Reduction in general antibiotic prescribing rates from 14.3% of patients pre-intervention to 11.0% post-intervention (RR 0.77, 95% CI 0.72 to 0.83)</li> <li>Reduction in URTI-specific antibiotic prescribing rates from 27.7% and 16.6% post-intervention (RR 0.60, 95% CI 0.54 to 0.66)</li> <li>No significant change in prescribing habits among control physicians, i.e. those that did not participate in the study</li> </ul> |
| Sudan, 2006 [91]            | <ul style="list-style-type: none"> <li>20 health centers in Khartoum State were randomly assigned to receive either (a) no intervention; (b) audit and feedback; (c) audit and feedback + seminar; or (d) audit and feedback + academic detailing</li> <li>The targeted interventions involved audit and feedback alongside academic detailing</li> </ul>                                                                                          | <ul style="list-style-type: none"> <li>There was a significant reduction in the mean number of physician encounters where an antibiotic was prescribed by 6.3 and 7.7 (p&lt;0.001) at 1 and 3 months post-intervention, respectively</li> <li>The mean number of encounters where antibiotics were inappropriately prescribed was also significantly reduced post intervention (p&lt;0.001)</li> </ul>                                                                       |
| Bangladesh, 2007 [92]       | <ul style="list-style-type: none"> <li>3-arm study principally involving education divided into 3 groups:</li> <li>Group I – education surrounding current treatment guidelines and subsequent auditing of the prescribing of ARIs</li> <li>Group-II - Just education surrounding current treatment guidelines</li> <li>Group-III - Control group, i.e., no intervention)</li> </ul>                                                               | <ul style="list-style-type: none"> <li>The prescribing of unnecessary antibiotics to treat ARIs was significantly reduced (p&lt;0.01) compared to the pre-intervention period in Group I</li> <li>The average reduction in antibiotic prescribing (patient encounters) was 23.7% in Group I vs. 15.2% in Group II</li> <li>When factoring in the Control group (Group III), there was a 15.2% reduction in antibiotic prescribing in Group I and 6.9% in Group II</li> </ul> |
| Nepal, 2009 [93]            | <p>Principally educational initiatives:</p> <ul style="list-style-type: none"> <li>Supervision/ monitoring via periodic visits by district supervisors to 41 primary health care (PHC) facilities</li> <li>Small-group training among prescribers followed by peer-group discussions as well as self-assessment of the data presented</li> </ul>                                                                                                   | <ul style="list-style-type: none"> <li>In children &lt; 5 years, there was a significant improvement with respect to decreasing the prescribing of antimicrobials to treat children with diarrhea</li> <li>There was also a significant improvement in the prescribing of antibiotics for patients with URTIs without pneumonia</li> </ul>                                                                                                                                   |
| Thailand, 2014 [94]         | <p>Principally education which included:</p> <ul style="list-style-type: none"> <li>Training HCPs on the rational use of antibiotics</li> <li>Introduction of practice guidelines</li> <li>Potential for throat swabs (stool cultures for acute diarrhea)</li> <li>Printed brochures for patients/ relatives in waiting rooms. This included the potential harm associated with the overuse of antibiotics for URTIs and acute diarrhea</li> </ul> | <p>The multifaceted program resulted in:</p> <ul style="list-style-type: none"> <li>Limited prescribing of antibiotics for URTIs (13.0%) and for acute diarrhea (19.1%)</li> <li>Clinical responses on day 3 among patients after receiving care revealed more than 97% of patients who received antibiotics/ those who did not receive antibiotics were cured or improved</li> </ul>                                                                                        |

|                     |                                                                                                                                                                                                                                                                                                                                                                                                                                                                                                                                                                                        |                                                                                                                                                                                                                                                                                                                                                                                                                                                                                                  |
|---------------------|----------------------------------------------------------------------------------------------------------------------------------------------------------------------------------------------------------------------------------------------------------------------------------------------------------------------------------------------------------------------------------------------------------------------------------------------------------------------------------------------------------------------------------------------------------------------------------------|--------------------------------------------------------------------------------------------------------------------------------------------------------------------------------------------------------------------------------------------------------------------------------------------------------------------------------------------------------------------------------------------------------------------------------------------------------------------------------------------------|
| Kenya 2017 [95]     | <ul style="list-style-type: none"> <li>• A comprehensive set of interventions to improve the management of URTIs, UTIs, STIs and childhood diarrhea in PHCs. <ul style="list-style-type: none"> <li>• Interventions included: <ul style="list-style-type: none"> <li>○ Online educational programs explaining the clinical guidelines for these 4 conditions</li> <li>○ 2-hour educational sessions</li> <li>○ Monthly feedback meetings</li> <li>○ Materials including posters and other material to remind prescribers of appropriate prescribing</li> </ul> </li> </ul> </li> </ul> | <ul style="list-style-type: none"> <li>• Adherence to agreed clinical quality measures (CQM) increased from 41.4% to 77.1% for PHCs that took part in the intervention but dropped slightly from 26.5% to 21.8% in controls over the 6-month study period. This was greatest for UTIs</li> <li>• Adherence to CQMs significantly increased over the 6-month study period for the active intervention group</li> </ul> <p>The interventions were well received by those operating in the PHCs</p> |
| India, 2018 [96]    | <ul style="list-style-type: none"> <li>• Principally education to reduce the rate of inappropriate prescribing of antibiotics for URTIs <ul style="list-style-type: none"> <li>• Initiatives consisted of: <ul style="list-style-type: none"> <li>○ Repeated process of audit and feedback combined with interactive training sessions</li> <li>○ One-to-one case-based discussions</li> <li>○ Guideline development and broadcasting alongside coding updates</li> </ul> </li> </ul> </li> </ul>                                                                                      | <ul style="list-style-type: none"> <li>• Antibiotic prescribing among 222 audited patients reduced from 62.6% of patients with URTIs prescribed antibiotics to 7.2% following the multiple interventions</li> <li>• This was combined with an increase in the documentation of examination findings from 52.7% to 95.6% of patients justifying the treatment approach</li> </ul>                                                                                                                 |
| Malaysia, 2019 [97] | <p>Principally education involving educational toolkits included a training module for HCPs on URTI and acute diarrhea involving:</p> <ul style="list-style-type: none"> <li>• One-hour educational sessions covering diagnostic criteria and treatment decision pathways</li> <li>• Educational posters in Malay and English hung in patient waiting areas and consultation rooms</li> <li>• Multimedia educational videos in the patient waiting areas</li> <li>• Physician reminders</li> </ul>                                                                                     | <p>Appreciable reduction in antibiotic prescribing:</p> <ul style="list-style-type: none"> <li>• URTIs down from 29.1% to 13.7%</li> <li>• Acute diarrhea down from 11.2% to 6.7%</li> </ul>                                                                                                                                                                                                                                                                                                     |

NB: ARIs = Acute Respiratory Tract Infections; HCPs: Healthcare Professionals; PHCs = Primary Healthcare Centers; STIs = Sexually Transmitted Infections; URTIs = Upper Respiratory Tract Infections; UTIs = Urinary Tract Infections

**Table S2.** - Summary of ASPs and other activities to reduce inappropriate dispensing of antibiotics without a prescription among LMICs and their impact.

| Country and reference              | Intervention and Aims                                                                                                                                                                                                                                                                                                                                                                                                                                                                                                                                                                                                                                                        | Impact of the Intervention                                                                                                                                                                                                                                                                                                                                                                                                                                                                                                                                                                                                                                                                                                                                                                                                                                                                       |
|------------------------------------|------------------------------------------------------------------------------------------------------------------------------------------------------------------------------------------------------------------------------------------------------------------------------------------------------------------------------------------------------------------------------------------------------------------------------------------------------------------------------------------------------------------------------------------------------------------------------------------------------------------------------------------------------------------------------|--------------------------------------------------------------------------------------------------------------------------------------------------------------------------------------------------------------------------------------------------------------------------------------------------------------------------------------------------------------------------------------------------------------------------------------------------------------------------------------------------------------------------------------------------------------------------------------------------------------------------------------------------------------------------------------------------------------------------------------------------------------------------------------------------------------------------------------------------------------------------------------------------|
| <b>A) Successful Interventions</b> |                                                                                                                                                                                                                                                                                                                                                                                                                                                                                                                                                                                                                                                                              |                                                                                                                                                                                                                                                                                                                                                                                                                                                                                                                                                                                                                                                                                                                                                                                                                                                                                                  |
| Bangladesh [98]                    | <ul style="list-style-type: none"> <li>• Drug sellers in Dhaka participated in 6 standardized role-playing scenarios</li> <li>• An ARI guideline was developed following the role-play coupled with a one-day educational course regarding the appropriate management of ARIs</li> <li>• The guidelines only recommended antibiotics for children with complicated ARI</li> </ul>                                                                                                                                                                                                                                                                                            | <p>Mixed results:</p> <ul style="list-style-type: none"> <li>• In children, the dispensing of antibiotics for uncomplicated ARIs decreased (30% baseline vs. 21% post-intervention; <math>p = 0.04</math>)</li> <li>• However, drug sellers were equally likely to dispense antibiotics for complicated ARIs and referrals to physicians for complicated ARIs decreased (70% baseline vs. 58% post-intervention; <math>p = 0.03</math>)</li> <li>• For adults, the dispensing of antibiotics without a prescription remained similar for patients with uncomplicated ARI (48% baseline vs. 40% post-intervention; <math>p = 0.1</math>) but increased among those with complicated ARI (44% baseline vs. 78% post-intervention; <math>p &lt; 0.001</math>)</li> </ul>                                                                                                                            |
| China [99]                         | <ul style="list-style-type: none"> <li>• Multiple initiatives were introduced in Shaanxi Province in China to reduce the purchasing of antibiotics without a prescription given rising concerns <ul style="list-style-type: none"> <li>• These included: <ul style="list-style-type: none"> <li>○ Stricter regulations for dispensing antibiotics</li> <li>○ Improved education of pharmacists <ul style="list-style-type: none"> <li>○ Stipulating there must be a qualified pharmacist's present to dispense antibiotics</li> <li>○ Increased frequency of unannounced pharmacy inspections alongside punishments for abuse</li> </ul> </li> </ul> </li> </ul> </li> </ul> | <ul style="list-style-type: none"> <li>• These multiple measures resulted in: <ul style="list-style-type: none"> <li>○ Decreased antibiotic sales between 2011 and 2017</li> <li>○ Decreased dispensing of antibiotics without a prescription for a 5 year old child with diarrhoea between 2011 and 2017 - from 72.3% to 50.2% (<math>p &lt; 0.0001</math>) among simulated patients</li> <li>○ A reduction in the dispensing of antibiotics for simulated patients with URTIs – down from 95.8% to 69.5% (<math>p &lt; 0.0001</math>)</li> </ul> </li> </ul>                                                                                                                                                                                                                                                                                                                                   |
| Kenya [83,100-103]                 | <ul style="list-style-type: none"> <li>• Multiple activities including: <ul style="list-style-type: none"> <li>• Education among pharmacists linked to the Pharmacy undergraduate programme at the University of Nairobi (UoN)</li> </ul> </li> <li>• Regular interaction with University staff and students regarding key issues surrounding antibiotics and AMR, especially inappropriate use <ul style="list-style-type: none"> <li>• The University launched and implemented an AMS curriculum for undergraduate pharmacy students as part of its NAP to reduce AMR</li> </ul> </li> </ul>                                                                               | <ul style="list-style-type: none"> <li>• Low level of dispensing of antibiotics without a prescription (94.1% of antibiotics dispensed with a valid prescription) in the study of Mukokinya et al. (2018) among pharmacies allied to the UoN – <ul style="list-style-type: none"> <li>• Contrasts with pharmacies not allied to the university and are not supervised by pharmacists - in the study by Muloi et al. (2019), 52% of surveyed pharmacists not allied to the University had sold antibiotics without a prescription</li> </ul> </li> <li>• In the study of Opanga et al. (2021) at the start of the COVID-19 pandemic, there was no purchasing of antimicrobials without a prescription among patients with actual or suspected COVID-19 among community pharmacies allied to the UoN. These community pharmacists typically recommended alternative treatments for ARIs</li> </ul> |

|                                                                    |                                                                                                                                                                                                                                                                                                                                                                                                                                                                                                                                                                                                                                                                                                                                                                                                               |                                                                                                                                                                                                                                                                                                                                                                                                                                                                                                                                                                                                                                                                                                              |
|--------------------------------------------------------------------|---------------------------------------------------------------------------------------------------------------------------------------------------------------------------------------------------------------------------------------------------------------------------------------------------------------------------------------------------------------------------------------------------------------------------------------------------------------------------------------------------------------------------------------------------------------------------------------------------------------------------------------------------------------------------------------------------------------------------------------------------------------------------------------------------------------|--------------------------------------------------------------------------------------------------------------------------------------------------------------------------------------------------------------------------------------------------------------------------------------------------------------------------------------------------------------------------------------------------------------------------------------------------------------------------------------------------------------------------------------------------------------------------------------------------------------------------------------------------------------------------------------------------------------|
|                                                                    |                                                                                                                                                                                                                                                                                                                                                                                                                                                                                                                                                                                                                                                                                                                                                                                                               | <ul style="list-style-type: none"> <li>This compares with the study of Kimathi et al. (2022) who found 23.4% of patients had self-medicated with antibiotics during the pandemic, 60.6% at the onset of COVID-19 symptoms before confirmatory tests, with 51.5% self-medicating more than once</li> </ul>                                                                                                                                                                                                                                                                                                                                                                                                    |
| Namibia [78, 104]                                                  | <ul style="list-style-type: none"> <li>Education of pharmacists starting in universities and continuing post qualification</li> <li>Implementation of regulations banning the purchasing of antibiotics without a prescription <ul style="list-style-type: none"> <li>Activities of community pharmacies regularly monitored</li> </ul> </li> </ul>                                                                                                                                                                                                                                                                                                                                                                                                                                                           | <ul style="list-style-type: none"> <li>In a survey among 100 households in Namibia, typically cold/flu medication, paracetamol, and decongestants were used to treat adults or their children with ARIs including for common colds and influenza. There was no purchasing of antibiotics without a prescription</li> <li>A similar situation was seen during the COVID-19 pandemic with no change in antibiotic utilization patterns early in the pandemic among 55 community pharmacies surveyed</li> </ul>                                                                                                                                                                                                 |
| Republic of Srpska [84,105]                                        | <ul style="list-style-type: none"> <li>Multiple interventions including: <ul style="list-style-type: none"> <li>Education of pharmacists regarding the appropriate management of infectious diseases including ARIs</li> <li>Production of guidelines for the 42 most frequent diseases and conditions seen in everyday practice in community pharmacies</li> <li>Greater enforcement of the regulations of guidelines banning the dispensing of antibiotics without a prescription together with possible fines for violation of laws (Euro500–1500 for pharmacy directors and Euro500–750 for pharmacy technicians)</li> <li>Special attention given to the importance of adequate communication and skills among community pharmacists especially given their increasing importance</li> </ul> </li> </ul> | <ul style="list-style-type: none"> <li>The dispensing of antibiotics without a prescription decreased from 58% to 18.5% of pharmacies</li> <li>OTC therapy to alleviate symptoms was offered in 72.3% of pharmacies in 2015 - up from 67.2% in 2010</li> <li>OTC medication dispensed included analgesics and antihistamines, throat and nasal sprays, decongestants and oral expectorants</li> <li>Significantly fewer pharmacies dispensed an antibiotic without a prescription where OTC medicines were offered</li> <li>Encouragingly, the most common reason for not dispensing an antibiotic to simulated clients with ARIs was that antibiotics cannot be dispensed without a prescription</li> </ul> |
| Uganda [106]                                                       | <ul style="list-style-type: none"> <li>Four-part intervention to improve the management of pediatric febrile illness among drug sellers. These included: <ul style="list-style-type: none"> <li>Training and work activities</li> </ul> </li> <li>Provision of information, education alongside communication</li> <li>Supply activities to drug sellers including diagnostics and medicines</li> <li>Monthly support supervision via supervisors trained in either pharmacy or clinical medicine</li> </ul>                                                                                                                                                                                                                                                                                                  | <ul style="list-style-type: none"> <li>The intervention increased the appropriate treatment of children with uncomplicated malaria, pneumonia symptoms and non-bloody diarrhoea by 80.2% (95% CI 53.2–107.2), 65.5% (95% CI 51.6–79.4) and 31.4% (95% CI 1.6–61.2) respectively versus the pre-intervention period</li> <li>Adherence to guidelines during the intervention phase was high without causing excessive prescribing of antimicrobial medicines</li> </ul>                                                                                                                                                                                                                                       |
| <b>B) Interventions that failed to achieve the desired outcome</b> |                                                                                                                                                                                                                                                                                                                                                                                                                                                                                                                                                                                                                                                                                                                                                                                                               |                                                                                                                                                                                                                                                                                                                                                                                                                                                                                                                                                                                                                                                                                                              |
| Chile [107,108]                                                    | <ul style="list-style-type: none"> <li>Introduction of a law in 2005 in Chile which banned the purchasing of antibiotics without a prescription</li> <li>Alongside this initial monitoring and enforcement</li> </ul>                                                                                                                                                                                                                                                                                                                                                                                                                                                                                                                                                                                         | <ul style="list-style-type: none"> <li>The initial enforcement of the law had a modest impact on overall antibiotic sales in the first three years of its implementation (-1.00 DDDs/ 1000 inhabitants per day)</li> <li>However, a follow-up study five years after implementation found a high number of pharmacies</li> </ul>                                                                                                                                                                                                                                                                                                                                                                             |

|                 |                                                                                                                                                                                                                                                                                                                                                                                                                                                                                                                                                                                                                                          |                                                                                                                                                                                                                                                                                                                                                                                                                                                                                          |
|-----------------|------------------------------------------------------------------------------------------------------------------------------------------------------------------------------------------------------------------------------------------------------------------------------------------------------------------------------------------------------------------------------------------------------------------------------------------------------------------------------------------------------------------------------------------------------------------------------------------------------------------------------------------|------------------------------------------------------------------------------------------------------------------------------------------------------------------------------------------------------------------------------------------------------------------------------------------------------------------------------------------------------------------------------------------------------------------------------------------------------------------------------------------|
|                 |                                                                                                                                                                                                                                                                                                                                                                                                                                                                                                                                                                                                                                          | (80.3%) were still not complying with the law due to lax monitoring                                                                                                                                                                                                                                                                                                                                                                                                                      |
|                 |                                                                                                                                                                                                                                                                                                                                                                                                                                                                                                                                                                                                                                          | <ul style="list-style-type: none"> <li>• These findings prompted calls for a greater enforcement of the law to reduce the purchasing of antibiotics without a prescription in the country</li> </ul>                                                                                                                                                                                                                                                                                     |
| Venezuela [107] | <ul style="list-style-type: none"> <li>• The government implemented policies in an attempt to limit the dispensing of three antibiotic groups without a prescription</li> <li>• However, there were no public awareness campaigns and no real 'enforcement' as this was via government publications with no active campaigns to follow up of the regulations</li> </ul>                                                                                                                                                                                                                                                                  | <ul style="list-style-type: none"> <li>• As a consequence, there was no decrease in antibiotic utilization levels in the country following the implementation of these modest policies</li> <li>• In fact, the opposite was seen with an actual increase in antibiotic utilisation in the country despite the policies</li> </ul>                                                                                                                                                        |
| Vietnam [86]    | <ul style="list-style-type: none"> <li>• There were strict regulations banning the dispensing of antibiotics without a prescription along with the monitoring of pharmacies</li> <li>• However, there were limited sanctions for community pharmacists when dispensing antibiotics without a prescription - a fine of only US\$15-25 per documented violation</li> <li>• However, going straight to community pharmacists is seen by patients as typically more convenient and does not waste time to see a physician, which may decrease daily wages</li> <li>• In addition, often limited monitoring of outlets in practice</li> </ul> | <ul style="list-style-type: none"> <li>• 487 out of 1,626 participants taking part in the study involving community pharmacies and drug sellers were able to purchase antibiotics without a prescription</li> <li>• 81.7% were able to purchase antibiotics without a prescription involving 29 different antibiotics</li> <li>• In 86.4% of the situations, participants were prescribed antibiotics by drug sellers</li> </ul> <p>Most antibiotics were sold to treat RTIs (61.4%)</p> |

Supplementary Table S3: Questionnaire

### Antimicrobials dispensing practices from community pharmacies/medical stores during COVID-19 in Punjab

#### Section 1 Information related to drug sale point

1. Name of division.....
2. Name of district.....
3. Name of tehsil.....
4. Code of pharmacy/medical store.....
5. Location of pharmacy/medical store
  - Urban
  - Rural
6. Presence of pharmacist/pharmacy technicians
  - Yes
  - No
7. Type of pharmacy/medical store
  - Chain
  - Independent
8. Number of encounters during study duration.....

## Section 2 Demographic characteristics of the patients/customers

1. Age of patients in years .....
2. Gender

Male

Female

3. Category of AM dispensed

Antibiotics

Antiviral

Antifungal

Anthelmintics

Antiprotozoal

## Section 3

### Detail of AM dispensed

| Name of agent (Non-proprietary) | Indication | Route of administration |
|---------------------------------|------------|-------------------------|
| Antibiotic                      |            |                         |
| Antiviral                       |            |                         |
| Antifungal                      |            |                         |
| Anthelmintics                   |            |                         |
| Antiprotozoal                   |            |                         |

If antibiotics were dispensed then, detail of antibiotics as per the AWaRe class

1. Access
2. Watch
3. Reserve
